# Supplementary material
Source: Atypon-hosted journal article supplement (https://sp.blackgold.org/Record/613306/DownloadSupplementalFile?fileId=99)
Supplement: DownloadSupplementalFile [file DownloadSupplementalFile]

Generic Nonfiction Questions from litlovers.com

1. What observations are made in the book? Does the author examine economics and politics, family traditions, the arts, religious beliefs, language or food? Does the author criticize or admire the culture? Does he/she wish to preserve or change the way of life? Either way, what would be risked or gained?

2. What is the central idea discussed in the book? What issues or ideas does the author explore? Are they personal, sociological, global, political, economic, spiritual, medical, or scientific?

3. Do the issues affect your life? How so—directly, on a daily basis, or more generally? Now or sometime in the future?

4. What evidence does the author use to support the book's ideas? Is the evidence convincing...definitive or...speculative? Does the author depend on personal opinion, observation, and assessment? Or is the evidence factual—based on science, statistics, historical documents, or quotations from (credible) experts?

5. What kind of language does the author use? Is it objective and dispassionate? Or passionate and earnest? Is it biased, inflammatory, sarcastic? Does the language help or undercut the author's premise?

6. What are the implications for the future? Are there long- or short-term consequences to the issues raised in the book? Are they positive or negative...affirming or frightening?

7. What solutions does the author propose? Are the author's recommendations concrete, sensible, doable? Who would implement those solutions?

8. How controversial are the issues raised in the book? Who is aligned on which sides of the issues? Where do you fall in that line-up?

9. Talk about specific passages that struck you as significant—or interesting, profound, amusing, illuminating, disturbing, sad...? What was memorable?

10. What have you learned after reading this book? Has it broadened your perspective about a difficult issue—personal or societal? Has it introduced you to a culture in another country...or an ethnic or regional culture in your own country?
